# Supplementary figures and images for: Tick-Borne Pathogens, Babesia spp. and Borrelia burgdorferi s.l., in Sled and Companion Dogs from Central and North-Eastern Europe
Source: MDPI journal article supplement (doi:10.3390/pathogens11050499), 2022-04-21

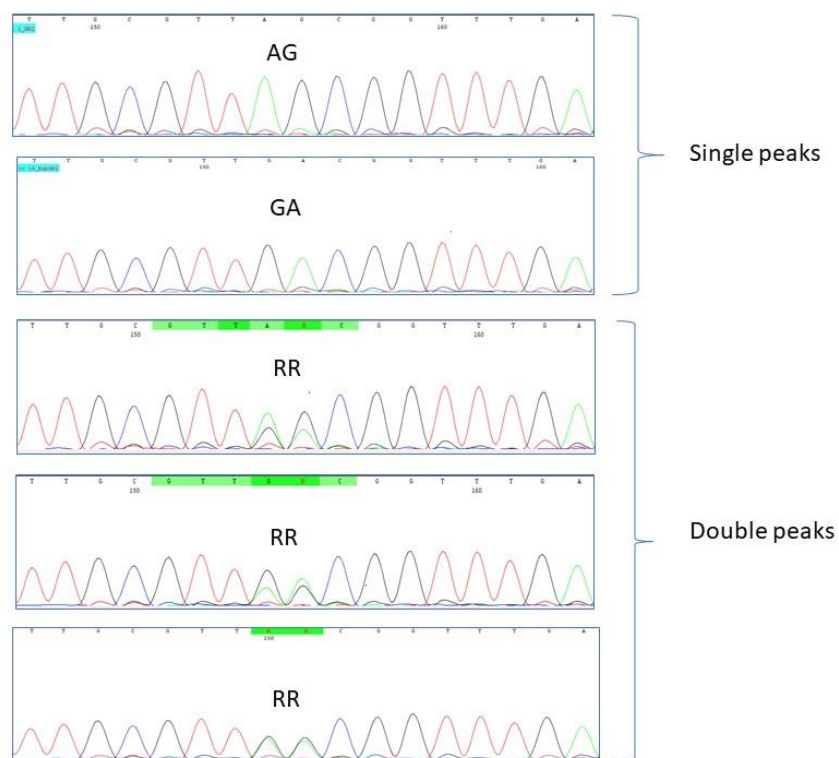

**Figure S1:** Chromatograms representing different 18S rDNA paralogs.

Supplement: s1 [file s1]
